# Supplementary material
Source: publisher figshare collection journal article supplement (https://acs.figshare.com/ndownloader/files/4023646)
Supplement: Supplementary file 1 [file 4023646]

## SUPPORTING INFORMATION

(5 pages)

### Reactivity of Ortho-Palladated Benzamides Toward CO, Isocyanides, and Alkynes. Synthesis of Functionalized Isoindolin-1-ones and 4,5-Disubstituted Benzo[*c*]azepine-1,3-diones

*Roberto Frutos-Pedreño, Pablo González-Herrero,\* and José Vicente\**

Grupo de Química Organometálica, Departamento de Química Inorgánica, Facultad de Química,  
Universidad de Murcia, Apdo. 4021, 30071 Murcia, Spain

*Peter G. Jones*

Institut für Anorganische und Analytische Chemie, Technische Universität Braunschweig,  
Postfach 3329, 38023 Braunschweig, Germany

#### Contents:

|                                                                                             | Page |
|---------------------------------------------------------------------------------------------|------|
| Synthesis of 2-iodo- <i>N</i> -methylbenzamide. ....                                        | S2   |
| Synthesis of 2-iodo- <i>N,N</i> -dimethylbenzamide.....                                     | S2   |
| <sup>1</sup> H NMR data of the mixture of <b>15a</b> and (tmedaH)TfO .....                  | S3   |
| <sup>1</sup> H NMR spectrum of the mixture of <b>15a</b> and (tmedaH)TfO.....               | S3   |
| Table of crystallographic data for <b>2a</b> , <b>3a</b> , <b>7a</b> , and <b>11b</b> ..... | S4   |
| Table of crystallographic data for <b>14b</b> , <b>15b</b> , <b>18</b> and <b>19</b> .....  | S5   |

**Synthesis of 2-iodo-*N*-methylbenzamide.** To a solution of 2-iodobenzoic acid (5 g, 20.16 mmol) in dry CH<sub>2</sub>Cl<sub>2</sub> (80 mL) was added SOCl<sub>2</sub> (10 mL, 137.85 mmol) and the mixture was stirred at 50 °C for 6 h under an N<sub>2</sub> atmosphere. The solvent was evaporated under reduced pressure to give an oil. Aqueous MeNH<sub>2</sub> (40%, 100 mL) was then added dropwise while keeping the solution at 0 °C in an ice-bath. The resulting suspension was stirred at 0 °C for 1 h and then concentrated to ca. 50 mL. The colorless precipitate was collected by filtration, washed with H<sub>2</sub>O (5 × 5 mL) and vacuum-dried at 50 °C for 16 h. Yield: 4.64 g, 88%. HRMS (ESI+, m/z): exact mass calcd for C<sub>8</sub>H<sub>9</sub>INO [M+H]<sup>+</sup> requires 261.9723, found 261.9729, error = 2.33 ppm. Mp: 153 °C (lit 145-147 °C<sup>1</sup>). The <sup>1</sup>H NMR data are in agreement with those reported in the literature.<sup>1</sup>

**Synthesis of 2-iodo-*N,N*-dimethylbenzamide.** To a solution of 2-iodobenzoic acid (5.00 g, 20.16 mmol) in dry CH<sub>2</sub>Cl<sub>2</sub> (80 mL) was added SOCl<sub>2</sub> (10 mL, 137.85 mmol) and the mixture was stirred at 50 °C for 6 h under an N<sub>2</sub> atmosphere. The solvent was evaporated under reduced pressure to give an oil. Aqueous Me<sub>2</sub>NH (40%, 40 mL) was then added dropwise while keeping the solution at 0 °C in an ice-bath. The mixture was stirred at 0 °C for 30 min, treated with a saturated solution of K<sub>2</sub>CO<sub>3</sub> in H<sub>2</sub>O (100 mL), and extracted with CH<sub>2</sub>Cl<sub>2</sub> (3 × 50 mL). The combined organic extracts were dried over anhydrous MgSO<sub>4</sub> and filtered. The solvent was then evaporated under reduced pressure and the residue was vacuum-dried at 60 °C for 16 h to give the product as a viscous oil. Yield: 5.30 g, 96%. HRMS (ESI+, m/z): exact mass calcd for C<sub>9</sub>H<sub>11</sub>INO [M+H]<sup>+</sup> requires 275.988, found 275.9891, error = 3.96 ppm. The <sup>1</sup>H NMR data are in agreement with those reported in the literature.<sup>2</sup>

---

<sup>1</sup> Kundu, N. G.; Khan, M. W. *Tetrahedron* **2000**, *56*, 4777–4792.

<sup>2</sup> Schröder, N.; Wencel-Delord, J.; Glorius, F. *J. Am. Chem. Soc.* **2012**, *134*, 8298–8301.

**<sup>1</sup>H NMR (400.9 MHz, CDCl<sub>3</sub>) of the mixture of 3-[carboxy(methoxycarbonyl)methyl]-2-methyl-3-phenylisoindolin-1-one (15a) and (tmedaH)TfO.** δ 9.60 (br, 2 H), 8.09 (d, <sup>3</sup>J<sub>HH</sub> = 7.6 Hz, 1 H), 7.73 (m, 2 H), 7.56 (m, 2 H), 7.47 (m, 2 H), 7.39 (td, <sup>4</sup>J<sub>HH</sub> = 1.2 Hz, <sup>3</sup>J<sub>HH</sub> = 7.2 Hz, 1 H), 7.33-7.23 (m, 6 H), 7.13 (m, 2 H), 7.00 (m, 2 H), 4.82 (s, 1 H), 4.72 (s, 1 H), 3.69 (s, 3 H), 3.59 (s, 3 H), 3.17 (s, 6 H, CH<sub>2</sub>, tmedaH<sup>+</sup>), 2.87 (s, 3 H), 2.59 (s, 3 H, 12 H, Me, tmedaH<sup>+</sup>).

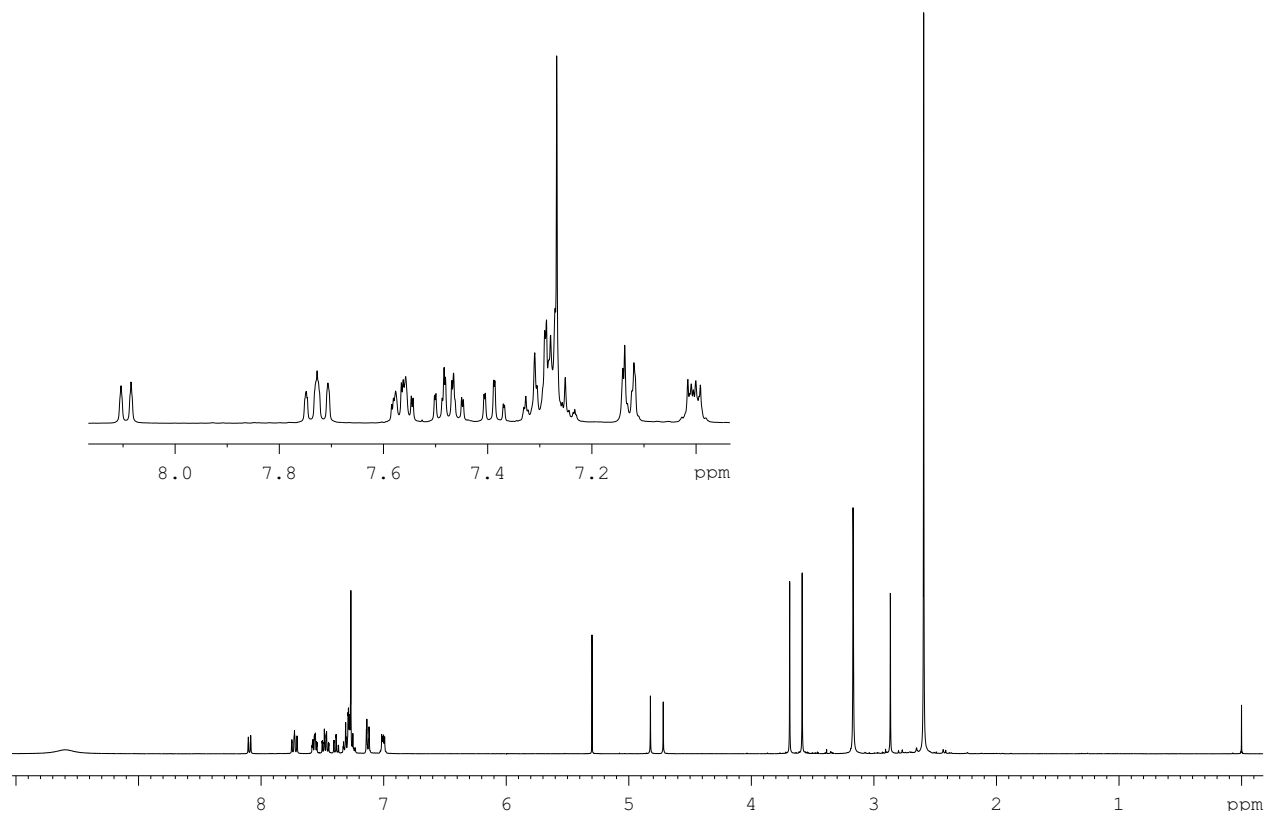

**Figure S1.** <sup>1</sup>H NMR spectrum (400.9 MHz, CDCl<sub>3</sub>) of the mixture of **15a** and (tmedaH)TfO.

**Table S1.** Crystallographic Data for **2a**, **3a**, **7a**, and **11b**.

|                                 | <b>2a</b>                                                                        | <b>3a</b> ·1.17H <sub>2</sub> O                                        | <b>7a</b>                                                                        | <b>11b</b>                                                                       |
|---------------------------------|----------------------------------------------------------------------------------|------------------------------------------------------------------------|----------------------------------------------------------------------------------|----------------------------------------------------------------------------------|
| formula                         | C <sub>14</sub> H <sub>22</sub> F <sub>3</sub> N <sub>3</sub> O <sub>4</sub> PdS | C <sub>13</sub> H <sub>21.34</sub> N <sub>3</sub> O <sub>1.17</sub> Pd | C <sub>23</sub> H <sub>30</sub> F <sub>3</sub> N <sub>3</sub> O <sub>4</sub> PdS | C <sub>25</sub> H <sub>32</sub> F <sub>3</sub> N <sub>3</sub> O <sub>6</sub> PdS |
| fw                              | 491.81                                                                           | 344.84                                                                 | 607.96                                                                           | 666.00                                                                           |
| <i>T</i> (K)                    | 100                                                                              | 100                                                                    | 100                                                                              | 100                                                                              |
| $\lambda$ (Å)                   | 1.54148                                                                          | 0.71073                                                                | 0.71073                                                                          | 0.71073                                                                          |
| cryst syst                      | trigonal                                                                         | monoclinic                                                             | orthorhombic                                                                     | orthorhombic                                                                     |
| space                           | <i>P</i> <sub>3</sub> <sub>2</sub> <sub>1</sub>                                  | <i>C</i> 2/ <i>c</i>                                                   | <i>Pbcn</i>                                                                      | <i>Pbca</i>                                                                      |
| <i>a</i> (Å)                    | 11.60504(8)                                                                      | 17.7877(7)                                                             | 28.1406(8)                                                                       | 17.8564(4)                                                                       |
| <i>b</i> (Å)                    | 11.60504(8)                                                                      | 12.4571(3)                                                             | 9.4389(3)                                                                        | 16.0031(4)                                                                       |
| <i>c</i> (Å)                    | 24.7296(2)                                                                       | 15.6840(6)                                                             | 19.7762(6)                                                                       | 19.9027(4)                                                                       |
| $\alpha$ (deg)                  | 90                                                                               | 90                                                                     | 90                                                                               | 90                                                                               |
| $\beta$ (deg)                   | 90                                                                               | 124.139(6)                                                             | 90                                                                               | 90                                                                               |
| $\gamma$ (deg)                  | 120                                                                              | 90                                                                     | 90                                                                               | 90                                                                               |
| <i>V</i> (Å <sup>3</sup> )      | 2884.31(4)                                                                       | 2876.42(17)                                                            | 5252.9(3)                                                                        | 5687.3(2)                                                                        |
| <i>Z</i>                        | 6                                                                                | 8                                                                      | 8                                                                                | 8                                                                                |
| $\rho_{\text{calcd}}$ (Mg)      | 1.699                                                                            | 1.593                                                                  | 1.538                                                                            | 1.556                                                                            |
| $\mu$ (mm <sup>-1</sup> )       | 9.3                                                                              | 1.3                                                                    | 0.8                                                                              | 0.8                                                                              |
| <i>R</i> 1 <sup><i>a</i></sup>  | 0.0144                                                                           | 0.0223                                                                 | 0.0306                                                                           | 0.0290                                                                           |
| <i>wR</i> 2 <sup><i>b</i></sup> | 0.0374                                                                           | 0.0531                                                                 | 0.0673                                                                           | 0.0656                                                                           |

<sup>*a*</sup>  $R1 = \sum ||F_o| - |F_c|| / \sum |F_o|$  for reflections with  $I > 2\sigma(I)$ . <sup>*b*</sup>  $wR2 = [\sum [w(F_o^2 - F_c^2)^2] / \sum [w(F_o^2)^2]]^{0.5}$  for all reflections;  $w^{-1} = \sigma^2(F^2) + (aP)^2 + bP$ , where  $P = (2F_c^2 + F_o^2)/3$  and *a* and *b* are constants set by the program.

**Table S2.** Crystallographic Data for **14b**, **15b**, **18** and **19**.

|                                             | <b>14b</b>                                      | <b>15b</b>                                      | <b>18</b> ·CH <sub>2</sub> Cl <sub>2</sub>                                       | <b>19</b>                                       |
|---------------------------------------------|-------------------------------------------------|-------------------------------------------------|----------------------------------------------------------------------------------|-------------------------------------------------|
| formula                                     | C <sub>18</sub> H <sub>15</sub> NO <sub>2</sub> | C <sub>20</sub> H <sub>19</sub> NO <sub>5</sub> | C <sub>21</sub> H <sub>31</sub> Cl <sub>2</sub> N <sub>3</sub> O <sub>5</sub> Pd | C <sub>14</sub> H <sub>13</sub> NO <sub>5</sub> |
| fw                                          | 277.31                                          | 353.36                                          | 582.79                                                                           | 275.25                                          |
| <i>T</i> (K)                                | 100                                             | 100                                             | 100                                                                              | 100                                             |
| $\lambda$ (Å)                               | 1.54148                                         | 0.71073                                         | 0.71073                                                                          | 1.54148                                         |
| cryst syst                                  | triclinic                                       | triclinic                                       | orthorhombic                                                                     | monoclinic                                      |
| space group                                 | <i>P</i> $\bar{1}$                              | <i>P</i> $\bar{1}$                              | <i>Pca</i> 2 <sub>1</sub>                                                        | <i>P</i> 2 <sub>1</sub> / <i>n</i>              |
| <i>a</i> (Å)                                | 8.8386(10)                                      | 8.5887(2)                                       | 18.1799(2)                                                                       | 10.2315(6)                                      |
| <i>b</i> (Å)                                | 9.2130(10)                                      | 13.2148(4)                                      | 8.36643(10)                                                                      | 6.8252(4)                                       |
| <i>c</i> (Å)                                | 10.0650(10)                                     | 15.8792(4)                                      | 15.7760(2)                                                                       | 18.2358(11)                                     |
| $\alpha$ (deg)                              | 115.140(10)                                     | 99.440(2)                                       | 90                                                                               | 90                                              |
| $\beta$ (deg)                               | 105.462(10)                                     | 96.959(2)                                       | 90                                                                               | 104.125(6)                                      |
| $\gamma$ (deg)                              | 98.329(10)                                      | 96.003(2)                                       | 90                                                                               | 90                                              |
| <i>V</i> (Å <sup>3</sup> )                  | 683.09(13)                                      | 1750.45(8)                                      | 2399.54(5)                                                                       | 1234.93(13)                                     |
| <i>Z</i>                                    | 2                                               | 4                                               | 4                                                                                | 4                                               |
| $\rho_{\text{calcd}}$ (Mg m <sup>-3</sup> ) | 1.348                                           | 1.341                                           | 1.613                                                                            | 1.480                                           |
| $\mu$ (mm <sup>-1</sup> )                   | 0.7                                             | 0.1                                             | 1.0                                                                              | 1.0                                             |
| R1 <sup>a</sup>                             | 0.0318                                          | 0.0443                                          | 0.0167                                                                           | 0.0320                                          |
| wR2 <sup>b</sup>                            | 0.0812                                          | 0.1085                                          | 0.0404                                                                           | 0.0903                                          |

<sup>a</sup>  $R1 = \Sigma||F_o| - |F_c|| / \Sigma|F_o|$  for reflections with  $I > 2\sigma(I)$ . <sup>b</sup>  $wR2 = [\Sigma[w(F_o^2 - F_c^2)^2] / \Sigma[w(F_o^2)^2]]^{0.5}$  for all reflections;  $w^{-1} = \sigma^2(F^2) + (aP)^2 + bP$ , where  $P = (2F_c^2 + F_o^2)/3$  and *a* and *b* are constants set by the program.
